# Supplementary material for: A pyruvate carbon flux tugging strategy for increasing 2,3-butanediol production and reducing ethanol subgeneration in the yeast Saccharomyces cerevisiae
Source: PubMed Central journal article supplement (PMC6020211; doi:10.1186/s13068-018-1176-y), 2018-06-26
Supplement: 13068_2018_1176_MOESM2_ESM.pdf [file 13068_2018_1176_MOESM2_ESM.pdf]

***Biotechnology for Biofuels***  
**Additional file 2:**

**Additional table (Table S1)**

**A pyruvate carbon flux tugging strategy for increasing 2,3-butanediol production and reducing ethanol subgeneration in the yeast *Saccharomyces cerevisiae***

Jun Ishii<sup>a,\*</sup>, Keisuke Morita<sup>b</sup>, Kengo Ida<sup>c</sup>, Hiroko Kato<sup>a,b</sup>, Shohei Kinoshita<sup>b</sup>, Shoko Hataya<sup>a</sup>, Hiroshi Shimizu<sup>b</sup>, Akihiko Kondo<sup>a,c,d</sup> and Fumio Matsuda<sup>b,d,\*\*</sup>

<sup>a</sup> Graduate School of Science, Technology and Innovation, Kobe University, 1-1 Rokkodai, Nada, Kobe 657-8501, Japan

<sup>b</sup> Department of Bioinformatic Engineering, Graduate School of Information Science and Technology, Osaka University, 1-5 Yamadaoka, Suita, Osaka 565-0871, Japan

<sup>c</sup> Department of Chemical Science and Engineering, Graduate School of Engineering, Kobe University, 1-1 Rokkodai, Nada, Kobe 657-8501, Japan

<sup>d</sup> RIKEN Center for Sustainable Resource Science, 1-7-22 Suehiro, Tsurumi, Yokohama 230-0045, Japan

**\*\*Corresponding author:** Fumio Matsuda

Department of Bioinformatic Engineering, Graduate School of Information Science and Technology, Osaka University, 1-5 Yamadaoka, Suita, Osaka 565-0871, Japan

Tel: +81-6-6879-7433, E-mail: [fmatsuda@ist.osaka-u.ac.jp](mailto:fmatsuda@ist.osaka-u.ac.jp)

**\*Co-corresponding author:** Jun Ishii

Graduate School of Science, Technology and Innovation, Kobe University, 1-1 Rokkodai, Nada, Kobe 657-8501, Japan

Tel: +81-78-803-6356, E-mail: [junjun@port.kobe-u.ac.jp](mailto:junjun@port.kobe-u.ac.jp)

**Table S1**

List of primers.

| No. | Primer                           | Sequence                                                                                                       |
|-----|----------------------------------|----------------------------------------------------------------------------------------------------------------|
| 1   | PDC5_URAb_1<br>(dPDC5up-URA3_fw) | 5'- TTTCTCTCTTTCTTATTACACTTATTTACATAATCAATCTCAAAGAGAACAACA<br>CAATACAATAACAAGAAGAACAATTTTTTGTTCCTTTTTTTTTGA    |
| 2   | PDC5_URAb_2<br>(dPDC5up-URA3_rv) | 5'- ATTGTGTTGTTCTCTTTGAGGGGTAATAACTGATATAATT                                                                   |
| 3   | PDC5_URAb_3<br>(dPDC5dn_fw)      | 5'- AATTATATCAGTTATTACCCCTCAAAGAGAACAACACAATACAATAACAAGAAGA<br>ACAAAGCTAATTAACATAAACTCATGATTCAACGTTTGTGTATT    |
| 4   | PDC5_URAb_4<br>(dPDC5dn_rv)      | 5'- CTTC AATTAGCTAAGATCATAGCTAAAGGTACAAAACCGA                                                                  |
| 5   | PDC5_URAb_check_fw               | 5'- TGCATACTTTATGCGTTTATGCGTTTTGCGCCCCTTGGA                                                                    |
| 6   | PDC5_URAb_check_rv               | 5'- AAAAAAAGCTTGTGAATAAAAATCTTTCGCTAAAAATCAA                                                                   |
| 7   | PDC6_URAb_1<br>(dPDC6up-URA3_fw) | 5'- CTTGTGCTATTGCAGTCCTCTTTTATATACAGTATAAATAAAAAACCCACGTAATAT<br>AGCAAAAACATATTGCCAACAAATTTTTTGTTCCTTTTTTTTTGA |
| 8   | PDC6_URAb_2<br>(dPDC6up-URA3_rv) | 5'- GCTATATTACGTGGGTTTTTGGGTAATAACTGATATAATT                                                                   |
| 9   | PDC6_URAb_3<br>(dPDC6dn_fw)      | 5'- AATTATATCAGTTATTACCCAAAAACCCACGTAATATAGCAAAAACATATTGCCAA<br>CAAAGCCATTAGTAGTGTACTCAAACGAATTATTGTTGCAAATA   |
| 10  | PDC6_URAb_4<br>(dPDC6dn_rv)      | 5'- TTTATAAGACAAGCGCAGGGCCAAAGAAAAAATAATAATT                                                                   |
| 11  | PDC6_URAb_check_fw               | 5'- CCCACACCAAAGGATGTTTTTTTTATATCACGTTCCCTTTT                                                                  |

|    |                                     |                                                                                                                |
|----|-------------------------------------|----------------------------------------------------------------------------------------------------------------|
| 12 | PDC6_URAb_check_rv                  | 5'- GAGATGAGCCAAAGCAGAAAAACAGGGGACGCCGCCCTTC                                                                   |
| 13 | MTH1dT_URAb_1<br>(MTH1dTup-URA3_fw) | 5'- CAAGCTCCCTACAGGCCATTCCGGAAAACACGATGAGTGGCAGTGATAATGCTT<br>CTTTTCAAAGTTTGCCACTATCAATGTTTTTTGTTCTTTTTTTTTGA  |
| 14 | MTH1dT_URAb_2<br>(MTH1dTup-URA3_rv) | 5'- GAAAAGAAGCATTATCACTGGGGTAATAACTGATATAATT                                                                   |
| 15 | MTH1dT_URAb_3<br>(MTH1dTdn_fw)      | 5'- AATTATATCAGTTATTACCCAGTGATAATGCTTCTTTTCAAAGTTTGCCACTATCA<br>ATGTTTTCTGCCCCCTCTACTGTGCACACGCAACTAACTAATG    |
| 16 | MTH1dT_URAb_4<br>(MTH1dTdn_rv)      | 5'- ACCCACCGTTATTACTTCCGGTAGTTGATTACCCCATTCG                                                                   |
| 17 | MTH1dT_URAb_check_f<br>w            | 5'- CAAATGACATTTTTCTTTCTTCTCAAACCTTGTAATGCG                                                                    |
| 18 | MTH1dT_URAb_check_rv                | 5'- TAGCCTCCATGTACAGATCCGAATGGACTAACGTTGCGAT                                                                   |
| 19 | PDC1_URAb_1<br>(dPDC1up-URA3_fw)    | 5'- TATTTCTTGTCATATTCCTTTCTCAATTATTATTTTCTACTCATAACCTCACGCAAAA<br>TAACACAGTCAAATCAATCAAATTTTTTTGTTCTTTTTTTTTGA |
| 20 | PDC1_URAb_2<br>(dPDC1up-URA3_rv)    | 5'- TATTTTGC GTGAGGTTATGAGGGTAATAACTGATATAATT                                                                  |
| 21 | PDC1_URAb_3<br>(dPDC1dn_fw)         | 5'- AATTATATCAGTTATTACCCTCATAACCTCACGCAAAAATAACACAGTCAAATCAAT<br>CAAAGCGATTTAATCTCTAATTATTAGTTAAAGTTTTATAAGCA  |
| 22 | PDC1_URAb_4<br>(dPDC1dn_rv)         | 5'- TGTTCCCTTAATCAAGGATACCTCTTTTTTTTTTCCTTGGTT                                                                 |
| 23 | PDC1_URAb_check_fw                  | 5'- TGGAATAATCAATCAATTGAGGATTTTATGCAAATATCGT                                                                   |
| 24 | PDC1_URAb_check_rv                  | 5'- GGCAGTTTTGAATTGAGTAACCATTATTTGTATCGAGGTG                                                                   |
| 25 | InF_XmaI_ALSAo_fw                   | 5'- TAGTGGATCCCCCGGGATGGCCGATGAAAGTACTGTGGGAAGC                                                                |

|    |                      |                                                                      |
|----|----------------------|----------------------------------------------------------------------|
| 26 | InF_XmaI_ALSAo_rv    | 5'- ATTCTCTAGAC <u>CCCCGGG</u> CTACCTAATAACGATATCCAAGACAACCTG        |
| 27 | NheI_alsSBs_fw       | 5'- AAAAGCTAGCATGACAAAAGCAACAAAAGAACAAAAATCC                         |
| 28 | BglII_alsSBs_rv      | 5'- AAAAAGATCTCTAGAGAGCTTTCGTTTTTCATGAGTTCCCC                        |
| 29 | NheI_alsCg_fw        | 5'- AATTGCTAGCGTGAATGTGGCAGCTTCTCAACAGCCCAC                          |
| 30 | XmaI_als1Cg_rv       | 5'- AAT <u>CCCCGGG</u> TATGCCTCGGTCGATTCAACGGCGGCATC                 |
| 31 | InF_SalI_ilvBEc_fw   | 5'- AAACGCTAGCGT <u>CGAC</u> ATGGCAAGTTCGGGCACAAC                    |
| 32 | InF_XmaI_ilvBEc_rv   | 5'- ATTCTCTAGAC <u>CCCCGGG</u> TATTCCCCCACCATTTCAG                   |
| 33 | InF_SalI_ilvGEc_fw   | 5'- AAACGCTAGCGT <u>CGAC</u> ATGAATGGCGCACAGTGGGT                    |
| 34 | InF_XmaI_ilvGEc_rv   | 5'- ATTCTCTAGAC <u>CCCCGGG</u> TCATGATAATTTCTCCAACA                  |
| 35 | InF_SalI_ilvIEc_fw   | 5'- AAACGCTAGCGT <u>CGAC</u> ATGGAGATGTTGTCTGGAGC                    |
| 36 | InF_XmaI_ilvIEc_rv   | 5'- ATTCTCTAGAC <u>CCCCGGG</u> TCAGGTTCTCTCCGTTTTGC                  |
| 37 | InF_SalI_AHAS2Gm_fw  | 5'- AAACGCTAGCGT <u>CGAC</u> ATGGCGGCCACAGCTTCCAGAACCAC              |
| 38 | InF_XmaI_AHAS2Gm_rv  | 5'- ATTCTCTAGAC <u>CCCCGGG</u> TCAGTACCTCGTTCTACCGTCTCCCTC           |
| 39 | SalI_AHAS3Gm_fw      | 5'- AATTG <u>TGCAC</u> ATGGCGGCTATAACTGCCCCAAAAGCTGCG                |
| 40 | SalI_AHAS3Gm_rv      | 5'- AAT <u>CCCCGGG</u> TCAGTAACTTGTCTGCCATCACCCCTCAG                 |
| 41 | InF_SalI_ilvGHe-1_fw | 5'- AAACGCTAGCGT <u>CGAC</u> ATGCATGACACCGACCGACACGACATGACC          |
| 42 | InF_XmaI_ilvGHe-1_rv | 5'- ATTCTCTAGAC <u>CCCCGGG</u> TCAGTCGTGACCGATGGCATCGGCCCA           |
| 43 | InF_SalI_ilvGHe-2_fw | 5'- AAACGCTAGCGT <u>CGAC</u> ATGACTTGTGCCAGCGACTGATCCAGCTC           |
| 44 | InF_XmaI_ilvGHe-2_rv | 5'- ATTCTCTAGAC <u>CCCCGGG</u> CTAAAGTGAGTCGGCCAGCCGGCGGGC           |
| 45 | SalI_alsL1_fw        | 5'- ATACG <u>TGCAC</u> ATGTCTGAGAAACAATTTGGGGCGAACTTGGTTGTCGATAGTTTG |
| 46 | XmaI_alsL1_rv        | 5'- CGTAC <u>CCCCGGG</u> TCAATAAACTCTTCAGGCAATAATTTTCTGCTAATTTAATG   |
| 47 | BamHI_alsLp_fw       | 5'- ATATGGATCCATGCCAGATAAGAAATATTACGGGGCCGAT                         |
| 48 | XmaI_alsLp_rv        | 5'- ATAT <u>CCCCGGG</u> TAAATAAACTGGTCTGGTAACATTGTCTT                |

---

---

|    |                      |                                                                   |
|----|----------------------|-------------------------------------------------------------------|
| 49 | NheI_alsSg-1_fw      | 5'- ATATGCTAGCGTGAGCCACGACCACGACGACCGGCCGCAG                      |
| 50 | BamHI_alsSg-1_rv     | 5'- ATATGGATCCCTACAGGTGCGTCGGCTCGAACATCCGCAG                      |
| 51 | NheI_alsSg-2_fw      | 5'- ATATGCTAGCATGATCAGCGTGAGCGACGCCGAGCACCGG                      |
| 52 | BamHI_alsSg-2_rv     | 5'- ATATGGATCCTCAGAGCGCCGAGTCGAGGTGCCCGAGGTG                      |
| 53 | NheI_alsTf_fw        | 5'- AATTGCTAGCATGACCGAGCAGATGACCGGAGCCCAATCG                      |
| 54 | XmaI_alsTf_rv        | 5'- AATTC <del>CCCGGG</del> CTATTCTTCCTCGTCGTCCCATTCAGGCGC        |
| 55 | BamHI_ALS1Zm_fw      | 5'- AATTGGATCCATGGAGATGGAGATCCACCAGGCACTCACC                      |
| 56 | XmaI_ALS1Zm_rv       | 5'- AATTC <del>CCCGGG</del> TCAGTACACAGTCCTGCCATCACCATCCAG        |
| 57 | InF_SalI_alsLpOp_fw  | 5'- AAACGCTAGCGTCGACATGCCAGACAAAAAGTATTATGGTGCCGAT                |
| 58 | InF_XmaI_alsLpOp_rv  | 5'- ATTCTCTAGAC <del>CCCGGG</del> TAGTAGAATTGGTCTGGCAACATAGTTTT   |
| 59 | InF_SalI_ilvBEcOp_fw | 5'- AAACGCTAGCGTCGACATGGCTTCTTCTGGTACTACTTCCACCAGA                |
| 60 | InF_XmaI_ilvBEcOp_rv | 5'- ATTCTCTAGAC <del>CCCGGG</del> TCATTCACCAACCATTTTCAGTATTTGCAGC |
| 61 | InF_SalI_alsTfOp_fw  | 5'- AAACGCTAGCGTCGACATGACTGAACAAATGACTGGTGCCCAATCT                |
| 62 | InF_XmaI_alsTfOp_rv  | 5'- ATTCTCTAGAC <del>CCCGGG</del> TCATTCTTCTTCATCATCCCATCTGGAGC   |
| 63 | InF_XmaI_alsLpOp_fw  | 5'- AATATAAAAC <del>CCCGGG</del> ATGCCAGACAAAAAGTATTATGGTG        |
| 64 | InF_AscI_alsLpOp_rv  | 5'- ATTTATTT <del>CGGCGCGCCT</del> TAGTAGAATTGGTCTGGCAACATAG      |
| 65 | InF_SalI_aldcBsOp_fw | 5'- AACAAACAAAGTCGACATGAAGAGAGAATCCAACATCCAAG                     |
| 66 | InF_NotI_aldcBsOp_rv | 5'- TAAATTCACGCGGCCGCTCATTCTGGAGAACCTTCAGTAG                      |
| 67 | InF_SalI_aldcEaOp_fw | 5'- AACAAACAAAGTCGACATGAACCATGCTTCTGATTGCACC                      |
| 68 | InF_NotI_aldcEaOp_rv | 5'- TAAATTCACGCGGCCGCTTAGGATTCAACAGATCTGATGG                      |
| 69 | InF_SalI_aldcKpOp_fw | 5'- AACAAACAAAGTCGACATGTCCGCTTTGTTGTCTGGTG                        |
| 70 | InF_NotI_aldcKpOp_rv | 5'- TAAATTCACGCGGCCGCTTAGGATTCAACAGATCTGATG                       |
| 71 | InF_SalI_aldcLlOp_fw | 5'- AACAAACAAAGTCGACATGACCGAAATCACCCAATTATTC                      |

---

---

|    |                      |                                                        |
|----|----------------------|--------------------------------------------------------|
| 72 | InF_NotI_aldcLlOp_rv | 5'- TAAATTCAC <u>CGGCCGCT</u> CATTCGGCAACGTCAATATCCTTC |
| 73 | InF_AvrII_BDH1Sc_fw  | 5'- CTCATATACACCTAGGATGAGAGCTTTGGCATATTT               |
| 74 | InF_FseI_BDH1Sc_rv   | 5'- ATAAGAAATTCGCG <u>GCCGGCCTT</u> ACTTCATTTACCGTGAT  |
| 75 | PmeI_BDH1Sc_fw       | 5'- ATGCGTTTAAACATGAGAGCTTTGGCATATTTCAAGAAGGGT         |
| 76 | FseI_BDH1Sc_rv       | 5'- ATGCG <u>GCCGGCCTT</u> ACTTCATTTACCGTGATTGTTAGGCGT |

---

·Underlining indicates restriction enzyme sites.
